1 **Molecular motor tug-of-war regulates elongasome cell wall synthesis dynamics in**  
2 ***Bacillus subtilis***

3 Stuart Middlemiss<sup>1\*</sup>, David M Roberts<sup>2,1</sup>, James Grimshaw<sup>1</sup>, Joshua M Edwards<sup>2,1</sup>, Zikai Sun<sup>3</sup>, Kevin D  
4 Whitley<sup>1</sup>, Thierry Blu<sup>3</sup>, Henrik Strahl<sup>1</sup>, and Séamus Holden<sup>2,1\*</sup>

5 1: Centre for Bacterial Cell Biology, Biosciences Institute, Faculty of Medical Sciences, Newcastle  
6 University, Newcastle upon Tyne, UK;

7 2: School of Life Sciences, University of Warwick, Gibbet Hill Campus, Coventry, UK.

8 3: Department of Electronic Engineering, The Chinese University of Hong Kong, Hong Kong.

9 \*: Corresponding authors: [seamus.holden@warwick.ac.uk](mailto:seamus.holden@warwick.ac.uk), [stuart.middlemiss@newcastle.ac.uk](mailto:stuart.middlemiss@newcastle.ac.uk)

10 **ABSTRACT**

11 Most rod-shaped bacteria elongate by inserting new cell wall material into the inner surface of the  
12 cell sidewall. This is primarily performed by a highly conserved protein complex, the elongasome,  
13 which moves processively around the cell circumference and inserts long glycan strands that act as  
14 barrel-hoop-like reinforcing structures, thereby giving rise to a rod-shaped cell. However, it remains  
15 unclear how elongasome synthesis dynamics and termination events are regulated to determine the  
16 length of these critical cell-reinforcing structures. To address this, we developed a method to track  
17 individual elongasome complexes around the entire circumference of *Bacillus subtilis* cells for  
18 minutes-long periods using single molecule fluorescence microscopy. We found that the *B. subtilis*  
19 elongasome is highly processive and that processive synthesis events are frequent terminated by rapid  
20 reversal or extended pauses. We found that cellular levels of RodA regulate elongasome processivity,  
21 reversal and pausing. Our single molecule data, together with stochastic simulations, show that  
22 elongasome dynamics and processivity are regulated by molecular motor tug-of-war competition  
23 between several, likely two, oppositely oriented peptidoglycan synthesis complexes bound to the  
24 MreB filament. Our data, thus, demonstrate that molecular motor tug-of-war is a key regulator of  
25 elongasome dynamics in *B. subtilis*, which likely also regulates the cell shape via modulation of  
26 elongasome processivity.

27

## 28 INTRODUCTION

29 Almost all bacteria are encased by a peptidoglycan-based cell wall, which is essential for their survival.  
30 To maintain a robust cell wall during growth and division, bacterial cell wall synthesis proteins must  
31 accurately and reliably expand and remodel a precisely shaped structure more than 100 times their  
32 size. Due to the high internal turgor of a bacterial cell, major errors in cell wall synthesis lead to lethal  
33 cell lysis. For this reason, the cell wall synthesis machinery is the principal target of many first-line  
34 antibiotics such as  $\beta$ -lactams, as well as last resort antibiotics such as vancomycin and daptomycin  
35 that are used to treat infections caused by multidrug resistant pathogens. A better understanding of  
36 the biophysical principles of cell wall synthesis is therefore critical for deciphering how this highly  
37 successful class of antibiotics can induce bacterial cell death, for developing the next generation of  
38 cell-wall-targeting antibiotics, as well as developing countermeasures against the adaptive processes  
39 bacteria utilise to evade those already in clinical use.

40 Most rod-shaped bacteria, including key model organisms such as Gram-positive *B. subtilis* and Gram-  
41 negative *Escherichia coli*, elongate by inserting new cell wall material into the inner surface of the cell  
42 wall. This is primarily performed by a highly conserved protein complex, the elongasome, which inserts  
43 long peptidoglycan strands circumferentially around the cell, giving rise to a rod-shaped cell  
44 morphology [1,2].

45 Gram-positive rod-shaped bacteria such as *B. subtilis* have a single cytoplasmic membrane surrounded  
46 by a thick multi-layered peptidoglycan cell wall. Elongasome-driven cell wall synthesis is performed  
47 pairs of enzymes comprised of the glycosyltransferase RodA, which polymerizes glycan strands; and a  
48 cognate class B transpeptidase (PBP2A or PBPH in *B. subtilis*) which attaches new strands to the  
49 existing cell wall [3]. These proteins, together with additional regulatory factors, are associated with  
50 the actin-homolog MreB, which forms antiparallel oriented  $\sim 200$  nm long double-filament structures  
51 [4]. These cytoskeletal structures guide peptidoglycan insertion perpendicular to the long axis of the  
52 cell [5]. *B. subtilis* also encodes two functionally redundant MreB homologues, Mbl and MreBH, which  
53 copolymerize with MreB [6]. As continuous glycan chains can stretch less than cross-linked peptides,  
54 circumferentially oriented glycan strands reinforce the cell sidewall and thereby establish a rod-like  
55 cell shape [1,2]. The overall level of elongasome-driven cell wall synthesis plays a major role in  
56 establishing both the all overall rod shape morphology and the specific cell diameter; high levels of  
57 elongasome-driven cell wall synthesis lead to stiff, narrow, rod-shaped cells whereas low levels lead  
58 to soft, wide, spherical cells [1,2].

59 The processive motion of the elongasome is driven by peptidoglycan synthesis [7–9]. It is likely that  
60 the initial length of elongasome-synthesized glycan strands is determined by the processivity of the  
61 elongasome, i.e., the distance that elongasomes move during an individual processive synthesis event.  
62 As the primary function of the elongasome is to maintain rod-shape and elongate the cell sidewall by  
63 inserting circumferential glycan strands, we hypothesized that elongasome processivity, and thus the  
64 length of elongasome-synthesized glycan strands, is likely to have substantial effect on cell wall  
65 stiffness and thereby cell shape. Put simply – if elongasome synthesized glycans act as reinforcing  
66 structures similar to metal hoops around a wooden barrel, the length of those reinforcing structures  
67 should determine the stiffness of the cell's short axis.

68 To test these hypotheses, we developed a new method to track individual elongasome complexes  
69 around the entire cell circumference for minutes-long periods. We found that the *B. subtilis*  
70 elongasome is highly processive and exhibits frequent reverses and pauses. Intriguingly, we found that  
71 cellular levels of RodA regulate elongasome processivity, reversal and pausing. Together with  
72 stochastic simulations, our single molecule data support an end-binding tug-of-war model where  
73 competition between two opposing peptidoglycan synthesis complexes, bound to each end of the

74 symmetrical MreB double filament, determine elongasome dynamics and processivity. Elongasome  
75 tug-of-war may also regulate *B. subtilis* cell shape via modulation of elongasome processivity. Our data  
76 demonstrate that molecular motor tug-of-war is a key regulator of elongasome dynamics, which may  
77 also play a major role in bacterial cell shape control in *B. subtilis*.

## 78 RESULTS

### 79 The *B. subtilis* elongasome is highly processive and frequently reverses and pauses

80 Previously, it was only possible to track elongasomes that are performing cell wall synthesis over  
81 distances less than about 500 nm, owing to the geometrical limitations of total internal reflection  
82 fluorescence (TIRF) imaging, which is usually used for such measurements but only illuminates a small  
83 fraction of the cell circumference [18, 19]. Previous estimates of elongasome processivity have been  
84 in the range of 400-600 nm [10], suggesting that these measurements were limited by the shallow  
85 illumination depth of the technique.

86 To address this limitation, we combined single molecule tracking with VerCINI (vertical cell imaging by  
87 nanostructured immobilization), a method we developed to orient rod-shaped cells perpendicular to  
88 the microscope imaging plane [11]. We used single molecule VerCINI (smVerCINI) to focus on a slice  
89 of the bacterial cell sidewall approximately 0.5  $\mu\text{m}$  thick (determined by the microscope objective  
90 depth of field), and tracked individual membrane bound MreB molecules in live *B. subtilis* cells using  
91 a previously characterized functional, native-locus MreB-HaloTag fusion [5]. We used a sub-  
92 stoichiometric labelling concentration of the bright cell-permeable JF549 (HaloTag ligand) JaneliaFluor  
93 dye [12] to sparsely label individual MreB molecules within membrane-bound MreB filaments (Fig.  
94 1a). Because MreB motion is circumferential [5,13], MreB filament dynamics are mostly constrained  
95 to within the VerCINI focal plane, allowing long term imaging of MreB filament dynamics (Fig. 1a).

96 We tracked MreB molecules using long (500 ms) camera exposure times such that freely diffusive  
97 molecules were not detected, allowing us to exclusively analyse MreB molecules assembled within  
98 membrane bound MreB filaments, while simultaneously reducing effective photobleaching rate using  
99 long (6 s) strobe intervals. We found that MreB filaments remain assembled at the membrane for  
100 extended periods of time, frequently reverse direction and sometimes pause for extended periods  
101 (Fig. 1b-c). As MreB filament motion is dependent on peptidoglycan synthesis, motile MreB filaments  
102 should correspond to fully assembled elongasome complexes actively engaged in peptidoglycan  
103 synthesis. Paused MreB filaments could correspond either to filaments where some or all the other  
104 critical elongasome components are missing/ unbound, or to fully assembled complexes, which are  
105 not currently synthesizing peptidoglycan.

106 We determined the binding lifetime of MreB subunits within filaments by stroboscopic illumination to  
107 be 128 s [95% CI: 109, 164] (Fig. 1d-e, [14]), showing that the MreB filaments remain assembled at the  
108 membrane for extended periods of time. This measurement represents a lower bound on the lifetime  
109 of both assembled MreB filaments, as it will be limited by occasional migration of the elongasome  
110 complexes beyond the microscope depth of field, and possibly by slow dissociation of MreB subunits  
111 from the MreB filament.

112

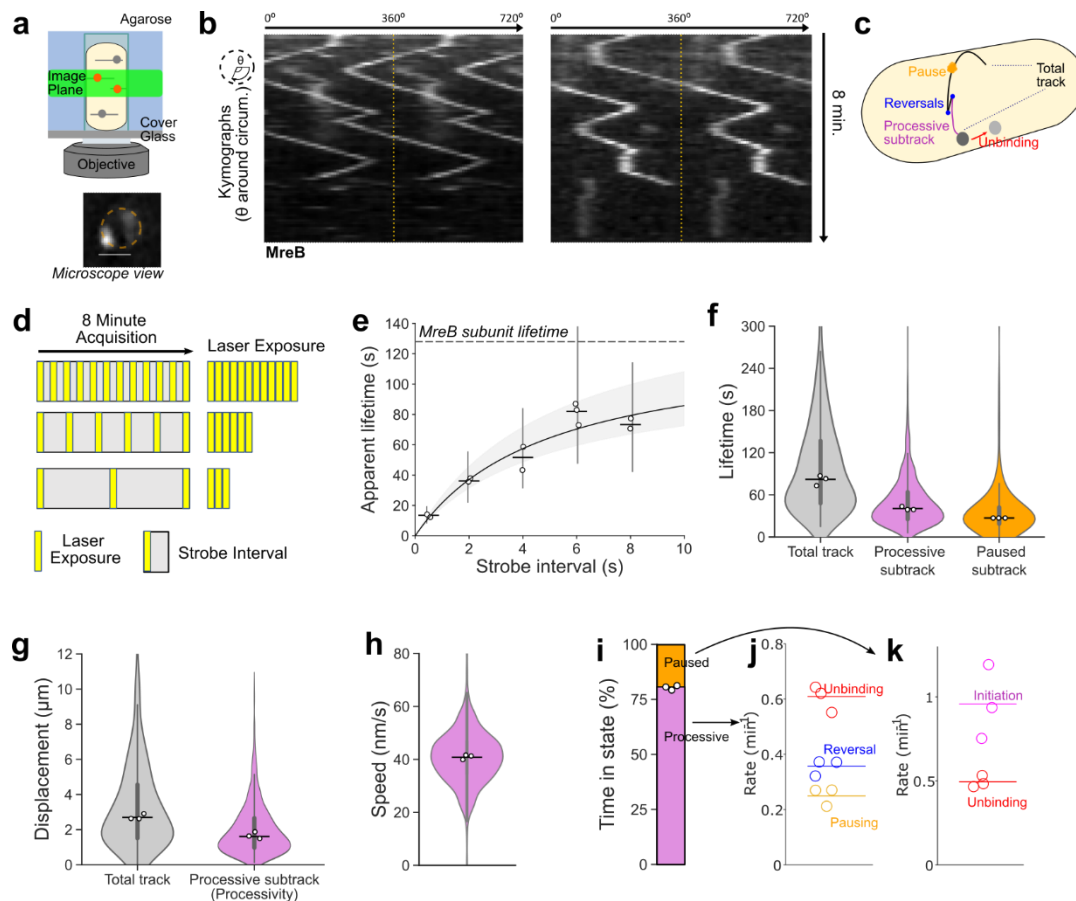

113

114 **Figure 1: Single molecule VerCINI (smVerCINI) measurements of MreB dynamics.** (a) Principle of smVerCINI. Grey lines represent individual MreB filaments, orange circles indicate MreB subunits sparsely labelled with JF549 fluorophore. (b) Exemplar kymographs of MreB filament dynamics. Kymographs are measured around the cell circumference. Two full revolutions around the cell (0–720°) are plotted side-by-side to resolve filament trajectories that pass 0°/360°, separated by yellow dotted lines. (c) Cartoon illustrating different types of MreB filament dynamics observed. (d) Principle of stroboscopic illumination: increasing intervals between constant illumination time reduce photobleaching and allow estimation of photobleaching rate and molecule unbinding rate. (e) Stroboscopic illumination plot of strobe interval versus apparent MreB subunit lifetime. Black line: non-linear fit of Gebhardt model (Methods). Grey area: 95% CI on fitted model. Horizontal dashed line: estimated MreB subunit lifetime. Vertical lines: IQR of apparent lifetimes. Fitted subunit lifetime  $\tau_{off}=128$  s [95% CI: 109, 164], photobleaching lifetime,  $\tau_{off}=13$ s [95% CI: 11, 16]. (f-g) MreB filament lifetime and circumferential track displacement for individual tracks and processive or static subtracks. (h) MreB filament speed for processive subtracks. (i) Time MreB filaments spend in each motion state. (j-k) Single molecule switching rates for MreB processive subtracks (j) and static subtracks (k). Measurements in b, f-k performed at 6 s strobe interval. White filled circles: median of biological replicates. Horizontal lines: median of all data points. Violin plots: Thick error bar lines indicate IQR, thin lines indicate adjacent vales. Strain used: *B. subtilis* SM01 (*mreB-HaloTag*,  $\Delta hag$ ).

130 We next characterized MreB motility by smVerCINI. We chose a strobe interval of 6 s, which extended  
 131 the effective photobleaching lifetime 12-fold to 156 s [95% CI: 132, 192] (Fig. 1e), longer than the  
 132 median observed MreB subunit lifetime. This allowed direct measurements of MreB single molecule  
 133 switching kinetics. We found that MreB filaments are motile 81 % of the time, [Range: 79-81,  $n=3$ ],  
 134 and immobile (paused) the rest of the time (Fig. 1i). MreB filaments frequently switch between motile  
 135 and paused states, and motile molecules frequently change direction (reversal) (Fig. 1i-k). The median  
 136 lifetimes of both the processive and paused motility states were substantial: 40.5 s [95% CI: 39.0, 43.0]  
 137 and 27.0 s [95% CI: 24.0, 29.5], respectively.

138 While elongasome pauses and reversals have been observed before, they were previously thought to  
139 be rare events [10,15], likely due to elongasome trajectory truncation due to TIRF imaging. Strikingly  
140 however, we found that 51 % [Range: 48-52,  $n=3$ ] of elongasome processive synthesis events are  
141 terminated by changes in elongasome dynamics - reversal or pausing – rather than by elongasome  
142 disassembly or MreB dissociation (Fig. 1j). These data thus demonstrate that bidirectional elongasome  
143 motility is a central feature of elongasome dynamics. Furthermore, given that so many synthesis  
144 events terminate due to changes in motility state rather than disassembly/ dissociation, elongasome  
145 bidirectional motility must play a significant role in determining elongasome processivity.

146 Using smVerCINI, we found that MreB filaments, and therefore *B. subtilis* elongasomes, are highly  
147 processive. Complete MreB tracks were found to contain multiple substrates, where MreB was  
148 observed either to move processively in the same direction at constant speed – corresponding to  
149 active cell wall synthesis [7–9], or to pause for extended periods. Processive subtracks were found to  
150 have a median displacement of 1.61  $\mu\text{m}$  [95% CI: 1.51, 1.69] (Fig.1g), or approximately 180° around  
151 the cell circumference. This is substantially greater than the 0.5  $\mu\text{m}$  previously estimated by TIRF [10].  
152 We found that MreB moved at constant speed, independent of the processive subtrack lifetime (Fig.  
153 1h, SI Fig. 2b). As this processivity likely determines the initial length of elongasome-synthesized glycan  
154 strands, these data support a model where the elongasome-synthesized peptidoglycan strands acts  
155 as major reinforcing structural elements in the cell sidewall, much like hoops around a barrel.

156 Given that cell wall synthesis rates correlate with cell growth, we wondered how cell growth rate  
157 affected elongasome processivity. Surprisingly, we found that large 3-fold changes in growth rate have  
158 only a modest effect on elongasome processivity and switching dynamics (Supplementary Figure 3).  
159 Deletion of *mltG*, which has been proposed as a possible terminator of peptidoglycan synthesis [16]  
160 also showed minimal effect on elongasome processivity (Supplementary Figure 4).

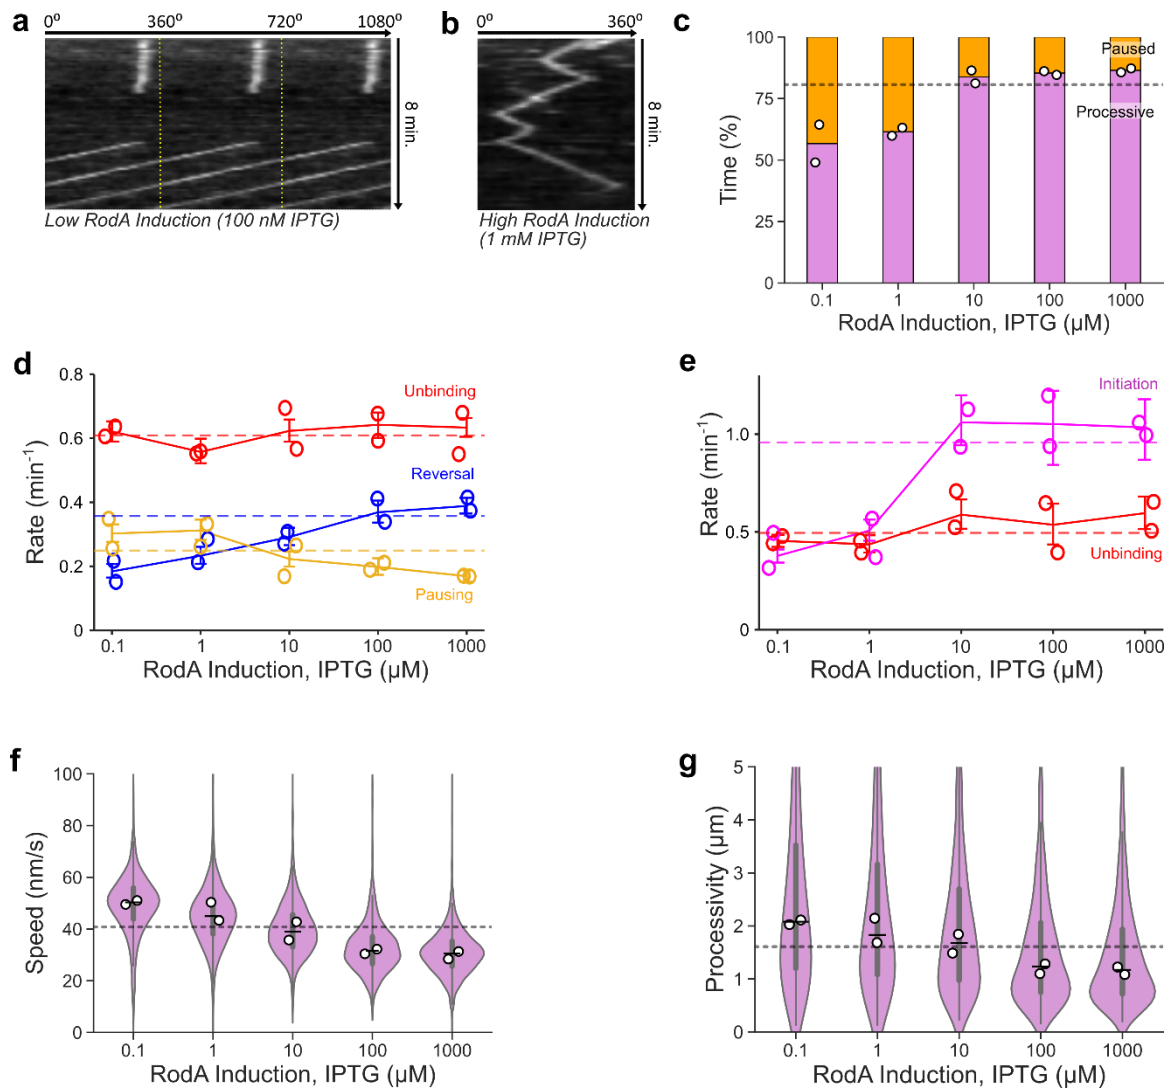

161

162 **Figure 2: Effect of cellular levels of RodA on MreB dynamics.** (a-b) Exemplar kymographs of MreB filament  
 163 dynamics at low (a) and high (b) RodA levels achieved through expression from an IPTG-inducible promoter.  
 164 Kymographs are measured around the cell circumference. More examples are shown in Supplementary Figure  
 165 9. (c) Time MreB filaments spend in each motion state as a function of *rodA* expression level. (d-e) Single  
 166 molecule switching rates for MreB processive subtracks (d) and static subtracks (e). Solid coloured lines  
 167 represent medians of all data points for each condition. (f-g) MreB filament speed and processivity for processive  
 168 subtracks. White filled circles: median of biological replicates. Horizontal dashed lines: value of each parameter  
 169 (eg rate, speed) at native *rodA* expression level in strain SM01 (*mreB-HaloTag*,  $\Delta$ *hag*). Narrow horizontal lines:  
 170 median of all data points. Violin plots: thick error bar lines indicate IQR, thin lines indicate adjacent values. Strain  
 171 used: *B. subtilis* SM28 (*mreB-HaloTag*, *Pspac-rodA*,  $\Delta$ *hag*). Further quantification in Supplementary Figure 7.

## 172 RodA expression level regulates bidirectional motility and elongasome processivity

173 It was previously speculated that elongasome reversals could be caused by molecular motor tug-of-  
 174 war, whereby two or more RodA-PBP2A/ PBPH synthesis complexes attached to a symmetrical MreB-  
 175 filament pull in opposite directions [18], similar to eukaryotic organelle transport [17]. However, this  
 176 proposal was not widely accepted as bidirectional motility of elongasomes was until now assumed to  
 177 be a rare, inconsequential feature of elongasome dynamics, as well as due to other limitations in the  
 178 original tug-of-war model, outlined in the next section.

179 Given our frequent observation of elongasome reversals and pauses which are strongly reminiscent  
 180 of eukaryotic molecular motor tug-of-war, we set out to test whether elongasome complexes might



181 indeed participate in molecular motor tug-of-war, and to determine whether tug-of-war mediated  
182 reversals might thereby determine elongasome processivity.

183 We titrated cellular levels of the elongasome transglycosylase, RodA, in a strain with inducible  
184 expression from the native locus (*rodA::P<sub>spac</sub>-rodA* [2]), and measured elongasome dynamics by  
185 smVerCINI of MreB-HaloTag. At low *rodA* expression levels, we observed that elongasomes exhibited  
186 extended pauses, infrequent reversals, and high speed (Fig. 2, Supplementary Figure 9). In contrast,  
187 at high *rodA* expression, pauses were rare, reversals more frequent and speeds lower (Fig. 2d). MreB  
188 pausing rate decreased 0.43-fold ( $-0.13 \text{ min}^{-1}$  difference [95% CI:  $-0.17, -0.10$ ]), reversal rate increased  
189 1.1-fold ( $0.20 \text{ min}^{-1}$  difference [95% CI:  $0.17, 0.24$ ]) and motile MreB speed decreased 0.39-fold ( $-19.7$   
190  $\text{nm s}^{-1}$  difference [95% CI:  $-20.3, -19.3$ ]) at high vs low *rodA* expression levels (1mM IPTG vs 100 nM  
191 IPTG induction, Figure 2d,f). No change was detected in MreB unbinding rate ( $0.01 \text{ min}^{-1}$  difference  
192 [95% CI:  $-0.03, 0.06$ ] (Fig. 2d), consistent with MreB movement being driven by peptidoglycan synthesis  
193 rather than MreB polymerisation/depolymerisation. Intriguingly, MreB processivity decreased 0.44-  
194 fold, ( $-0.91 \mu\text{m}$  difference [95% CI:  $-1.02, -0.78$ ]) between high and low *rodA* expression, and the  
195 processivity of cells expressing *rodA* from the native promoter was near the mid-point of this range  
196 (Fig. 2g).

197 Together, these data show that elongasome dynamics and processivity are sensitively regulated by  
198 the cellular concentration of RodA. The data are consistent with a model where increased RodA levels  
199 lead to more active synthesis complexes bound to each MreB filament, thereby causing more frequent  
200 incidences of tug-of-war between oppositely oriented synthesis complexes, leading to frequent rapid  
201 elongasome reversals. These data are also consistent with a model where high levels of tug-of-war  
202 reduce the overall elongasome processivity as a result of more frequent reversals and reduced  
203 average elongasome speed due to drag from competing synthesis complexes.

204 One possible alternative model is that elongasome reversals could be caused by collisions between  
205 two elongasome complexes. TIRF-structured illumination microscopy (SIM) has previously been used  
206 to observe isolated MreB filaments undergoing reversals without any other filaments nearby to collide  
207 with, inconsistent with the collision model [7,18]. In a third model, elongasome reversals could be  
208 caused by interactions with existing peptidoglycan; if, for example, glycans oriented at certain angles  
209 could act as effective barriers to the elongasome. While it is possible that interactions with the  
210 peptidoglycan may play some role in elongasome bidirectional motility, that model does not explain  
211 why elongasome reversal rate increases, or why pausing rate decreases, as *rodA* expression level is  
212 increased.

213 We also tested how single knockouts of the redundant elongasome transpeptidases PBP2A (*pbpA*) and  
214 PBPH (*pbpH*) affected elongasome dynamics. Deletions of these genes had little effect elongasome  
215 switching kinetics, speed or processivity (Supplementary Figure 4). These results support a model  
216 where the elongasome transpeptidases are in excess compared to RodA, and that RodA concentration,  
217 or its assembly to an elongasome complex, is the principal factor controlling the concentration of  
218 active elongasome synthesis complexes within the cell any given time.

219

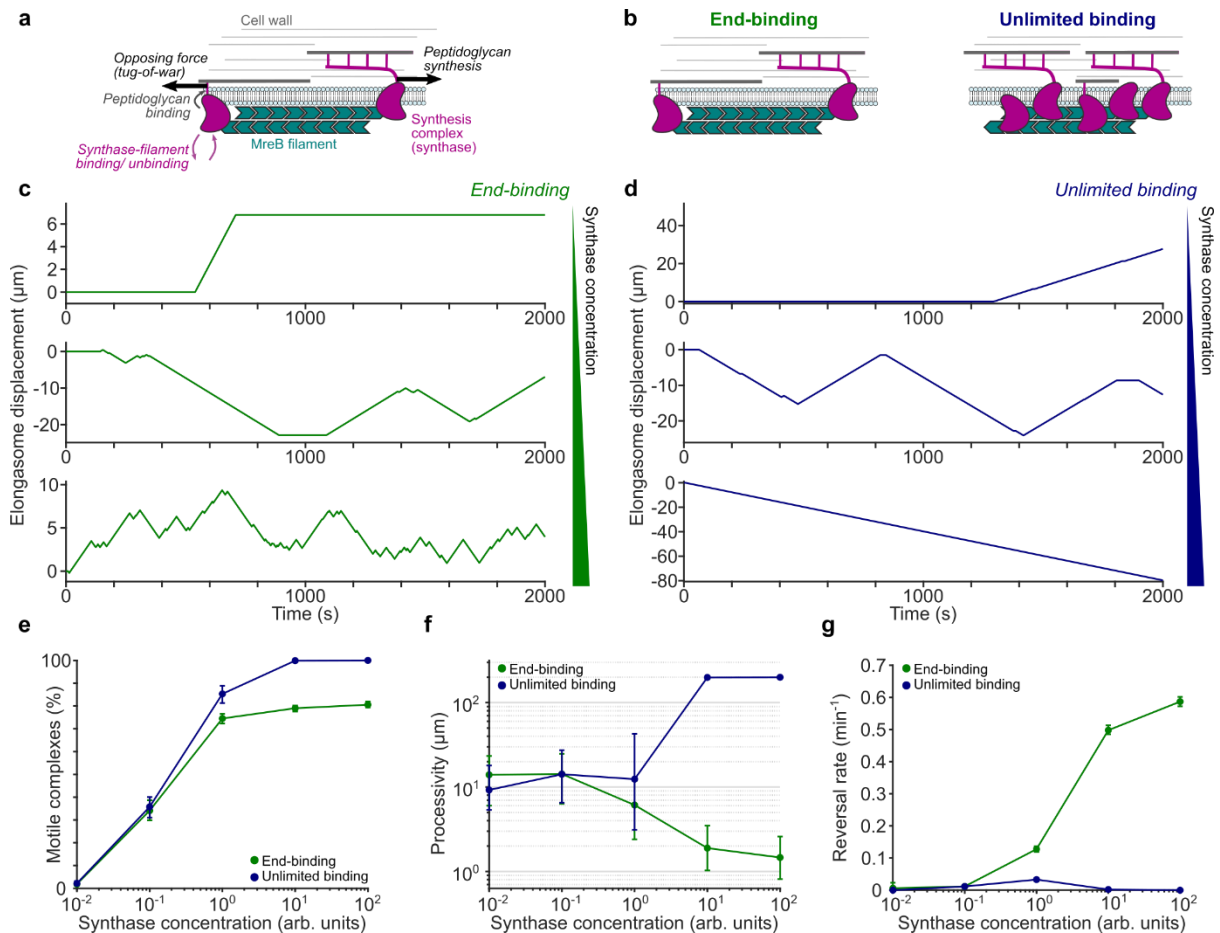

220

221 **Figure 3: Simulations of elongasome tug-of-war dynamics.** (a) Cartoon of elongasome complex dynamics as  
 222 implemented in the stochastic model. (b) Illustration of the two models of elongasome tug-of-war tested: *end-*  
 223 *binding*, where only one synthase complex can bind to each end of the antiparallel MreB double filament, in  
 224 opposite directions; *unlimited binding*, where multiple synthase complexes can bind along the MreB filament.  
 225 (c-d) Examples of simulated elongasome dynamics at low ( $10^{-2}$  arb. Units), intermediate ( $10^0$  arb. Units) and high  
 226 ( $10^2$  arb. Units) synthase complex (synthase) concentrations for end-binding and unlimited binding models. (e-  
 227 g) Fraction of motile elongasomes, processivity and reversal rate as a function of synthase complex  
 228 concentration for both models. Solid coloured lines with filled circles, sample medians; vertical lines, 95% CI.

229 **Stochastic simulations show that an end-binding tug-of-war model can explain experimentally**  
 230 **observed effects of RodA expression level on elongasome processivity and bidirectional motility**

231 Previously, it was proposed that elongasome tug-of-war between many synthases bound along the  
 232 entire MreB filament might regulate elongasome dynamics [18]; a scenario which we term the  
 233 *unlimited binding* elongasome tug-of-war model (Fig. 3b). However, this model was not widely  
 234 accepted as the bidirectional motility of elongasomes was until now assumed to be a relatively  
 235 unimportant feature of elongasome dynamics, mostly due to underestimation of elongasome pausing  
 236 and reversal rates [10,15]. The *unlimited-binding* tug-of-war model also assumed large numbers of  
 237 competing synthase complexes bound to a single MreB filament, which has since been found to be  
 238 unlikely [13] and predicted a strong dependence of elongasome speed upon MreB filament speed  
 239 which was later found not to be the case [13]. Furthermore, previous theoretical work on eukaryotic  
 240 molecular motors showed that as more molecular motors are added to an *unlimited-binding* tug-of-  
 241 war scenario, a runaway scenario occurs where reversals become exponentially less likely as a single  
 242 opposing motor must win the tug-of-war against an ever-greater number of engaged motors [19].  
 243 Taken together, the *unlimited-binding* model is not easy reconcile with our observations that MreB



244 reversal rate increases and processivity decreases at high RodA levels. To address this, and inspired by  
245 the observation that MreB forms a symmetric antiparallel double filament [4], we propose an *end-*  
246 *binding* elongasome tug-of-war model, where at most two synthesis complexes can bind to an MreB  
247 filament, one at each end, pointing in opposite directions (Fig. 3b). The *end-binding* model inherently  
248 avoids large numbers of synthesis complexes per filament, as well as the highly processive multi-motor  
249 scenario. Alternatively, we speculated that the *unlimited-binding* model might potentially be able to  
250 explain our experimental observations if cellular concentrations of elongasome synthesis complex  
251 components are low enough to limit the number of synthesis complexes per MreB filament to around  
252 1-2 on average, and thereby mostly avoid the runaway elongasome scenario.

253 To test these two models, we used Monte Carlo simulations to evaluate whether either the *end-*  
254 *binding* or *unlimited-binding* synthase tug-of-war models are physically plausible mechanisms to  
255 regulate elongasome reversal rate and processivity. The simulations are an extension of the Müller,  
256 Klumpp, and Lipowsky (MKL) model of eukaryotic cargo transport [19], and assume that that multiple  
257 RodA-bPBP synthesis complexes can bind to both the MreB filament and the existing cell wall to  
258 initiate peptidoglycan synthesis (Fig. 3a, Supplementary Note 1). Synthesis complexes attempting to  
259 perform peptidoglycan synthesis in opposite directions will stall and briefly engage in tug-of-war,  
260 resulting in either resumption of peptidoglycan synthesis in the original direction, or reversal and  
261 initiation of peptidoglycan synthesis in the opposite direction.

262 We performed simulations of each model over a range of synthesis complex concentrations, using an  
263 extension of the MKL model to allow concentration dependent binding/ unbinding of synthesis  
264 complexes from the MreB filament (Fig. 3, Supplementary Figure 5, Supplementary Note 1). Both  
265 models showed extended elongasome pausing and infrequent reversals at low synthesis complex  
266 concentrations (Fig. 3), similar to experimental measurements (Fig. 2). At intermediate synthesis  
267 complex concentration, elongasome reversal rate increased for both the *end binding* and *unlimited*  
268 *binding* models. At high synthesis complex concentrations, the *end binding* model still showed  
269 frequent reversals, consistent with our experimental data. However, the reversal rate for the  
270 *unlimited binding model* declined rapidly once the average number of bound synthesis complexes  
271 increased beyond two (Fig 3G). We also found that as synthesis complex concentration increased, the  
272 *end binding* model processivity decreased in a manner consistent with our experimental observations.  
273 While the *unlimited binding* model shows a transient increase in reversal rate at intermediate synthase  
274 concentrations, which could potentially partially reproduce experimental results, even in this regime  
275 we were not able to reproduce the experimentally observed increase in processivity as a function of  
276 synthase concentration in simulations of the *unlimited binding* model as implemented here.

277 These data show that an *end-binding* synthase tug-of-war model is a physically plausible model that  
278 is sufficient to recapitulate experimentally observed trends in elongasome reversal rate and  
279 processivity. Interestingly, this model also makes strong predictions about the structure, location and  
280 number of RodA-bPBP complexes on MreB filaments, which could be tested in future to better  
281 understand the molecular mechanisms underlying elongasome tug-of-war.

### 282 **Cell widening upon *rodA* overexpression may be driven by tug-of-war mediated reduction in** 283 **elongasome processivity**

284 RodA protein levels have previously been shown to control *B. subtilis* cell width in a non-trivial  
285 manner [2]: low or high RodA levels lead to abnormally wide cells, whereas intermediate levels ensure  
286 narrower, wild-type-like cell morphology. We confirmed that the cell widening phenotype upon *rodA*  
287 overexpression also occurred in the minimal media and culture conditions used in this study (Fig. 4a,  
288 Supplementary Figure 8a).

289 Recent studies support a model where that cellular levels of motile elongasomes determine cell width  
290 by controlling the density of newly synthesized circumferentially oriented glycan strands and thus  
291 regulating lateral cell wall stiffness. This model predicts that cell width decreases as elongasome  
292 synthase concentration increases [2]. However, this model is insufficient to explain the increase in cell  
293 width upon overexpression of *rodA* [2]. We found that cell widening upon *rodA* overexpression is not  
294 associated with any detectable change in surface density of motile MreB filaments (Fig. 4b), which  
295 have previously been shown to regulate cell width [2], nor any detectable change in cell growth rate  
296 (Supplementary Figure 8b).

297 Our findings that RodA levels determine elongasome processivity via tug-of-war mediated regulation  
298 (Fig. 2-3) provide a simple mechanistic model for the complex dependence of cell width on cellular  
299 RodA levels. We hypothesize that cells must maintain a balance between: (i) elongasome pausing at  
300 low synthase levels, which reduces cellular levels of motile elongasomes; and (ii) tug-of-war at high  
301 synthase levels, which reduces elongasome processivity (Fig. 2). Since elongasome synthesized glycan  
302 strands act to reinforce the cell sidewall, both the length and total number of elongasome synthesized  
303 glycans should determine cell sidewall stiffness and width. Therefore, an optimally stiff, narrow cell  
304 wall would be synthesized at intermediate synthase concentration levels, which balances the opposing  
305 constraints of density of active elongasomes and elongasome processivity (Fig. 5).

306 It was previously speculated that cell widening upon *rodA* overexpression could be caused by high  
307 levels of disorganized synthesis by RodA-bPBP complexes not bound to the elongasome [2]. However,  
308 experimental evidence has not yet been presented for that hypothesis. Further experiments will be  
309 required to conclusively determine whether elongasome tug-of-war, off-target RodA-bPBP synthesis  
310 or a combination of both drive cell widening upon *rodA* overexpression.

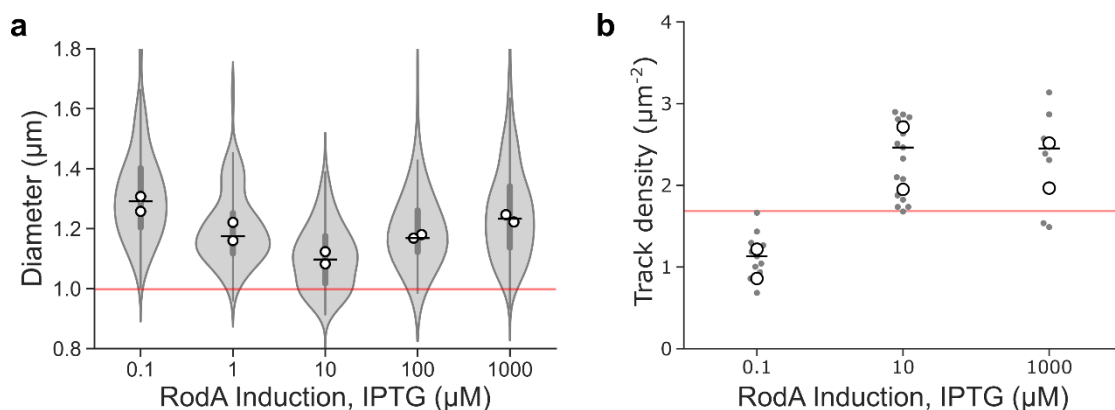

311  
312 **Figure 4: Effect of cellular levels of RodA on cell shape and MreB filament density.** Effect of titration of RodA  
313 cellular levels expressed as sole cellular copy from an inducible promoter on (a) cell diameter, and (b) surface  
314 density of motile MreB filaments measured by SIM-TIRF microscopy. Horizontal lines show overall median.  
315 Vertical lines indicate IQR. White filled circles indicate biological replicates. Grey filled circles indicate medians  
316 of each field of view in SIM-TIRF experiments. Red line indicates values for native RodA levels. Strain used: *B.*  
317 *subtilis* SM28 (*mreB-HaloTag*, *Pspac-rodA*,  $\Delta$ *hag*).

318

319 **DISCUSSION**

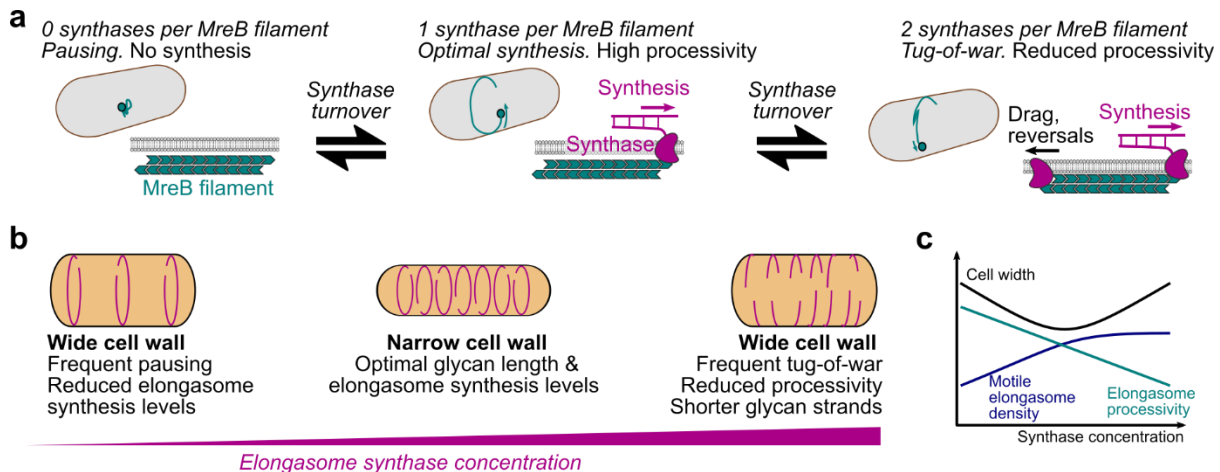

320

321 **Figure 5: Tug-of-war model of elongasome dynamics and cell size regulation.** (a) Model for effect of number of bound active synthesis complexes on elongasome dynamics. Note that synthases refer to complete synthesis complexes, i.e., active RodA-bPBP pairs. (b-c) Speculative model for effect of elongasome synthase concentration on cell shape.

325 The elongasome plays a central role in cell wall growth and maintenance of cell shape in a wide range of bacteria. In this study, we found that *B. subtilis* elongasomes are highly processive, with each event covering on average half the cell circumference, supporting a model where elongasome synthesized glycan strands function as major structural elements that reinforce the cell sidewall. We found that bidirectional motility – reversal and pausing – is not a rare curiosity as thought previously, but is a central feature of elongasome dynamics. We showed that elongasome processivity and bidirectional motility is regulated by molecular motor tug-of-war between multiple, likely maximally two, synthesis complexes bound in opposite directions on individual MreB filaments. We also found evidence that elongasome tug-of-war may regulate cell size and shape via modulation of elongasome processivity, and thereby the length of new glycan strands. These results establish molecular motor tug-of-war acts as a major regulator of bacterial cell wall synthesis activity.

336 Our study shows that molecular motor tug-of-war, previously thought to be a phenomenon exclusive to eukaryotic molecular motors, regulates MreB-cytoskeleton-associated cell wall synthesis in the model bacterium *B. subtilis*. Similar to bidirectional molecular motor transport in eukaryotes [17], molecular motor tug-of-war enables straightforward tuning of synthase dynamics, and could thereby facilitate rapid regulation of cell wall material properties, by regulating the concentration or activity of the Rod-complex. Tug-of-war mediated bidirectional motility may also allow obstacles in the cell wall to be avoided and peptidoglycan synthesis to be distributed evenly around the surface of the cell wall. Further studies will be required to determine the detailed molecular principles underlying elongasome tug-of-war and to conclusively determine the role and extent of molecular motor tug-of-war in regulating bacterial cell shape.

346

347 **ACKNOWLEDGEMENTS**

348 We thank Yoshi Kawai, Jeff Errington, Richard Daniel (Newcastle) and Ethan Garner (Harvard) for strains. We thank Cees Dekker (TU Delft, Netherlands) for nanofabricated VerCINI wafers and Luke Lavis (Janelia Farm, USA) for Janelia Fluor dyes. SH acknowledges funding support by a Wellcome Trust & Royal Society Sir Henry Dale Fellowship grant number 206670/Z/17/Z. SM and HS were supported

352 by UK Biotechnology and Biological Sciences Research Council (BBSRC) doctoral studentship  
353 (BB/M011186/1) and grant (BB/S00257X/1), respectively.

354 **AUTHOR CONTRIBUTIONS**

355 SM and JG created and characterised bacterial strains. SM, DMR and SH performed experiments. SM,  
356 DMR and SH analysed data. ZS and TB developed PureDenoiseGPU software. KW tested  
357 PureDenoiseGPU software. SH performed simulations. JE designed and built one of the custom  
358 microscopes used in the study. SH, SM and HS designed experiments. SH directed the research. SH  
359 and SM wrote the manuscript with input from all authors.

## 360 MATERIALS AND METHODS

### 361 Bacterial strains and growth conditions

362 Strains used in this study are listed below. Strains were streaked from -80°C freezer glycerol stocks  
363 onto Nutrient Agar (NA) plates containing the relevant antibiotics and/or inducers and grown  
364 overnight at 37°C. Starter cultures were prepared from a single colony in S750<sup>glucose</sup> media and grown  
365 with orbital agitation at 175 rpm overnight at 37°C. The next day, overnight cultures were diluted to  
366 an OD<sub>600</sub> of 0.05-0.1 in S750<sup>glucose</sup> media and grown at 30°C with orbital agitation at 175 rpm with any  
367 required inducer until they reached the appropriate OD<sub>600</sub>. Liquid cultures were grown in flasks with  
368 at least a 1:20 culture to flask volume ratio. Overnight cultures were grown in either 2 ml or 5 ml  
369 volumes, where day cultures were always grown in 5 ml volumes.

370 Microscopy was performed at 30°C. When necessary, antibiotics and inducers were used at the  
371 following final concentrations: chloramphenicol 5 µg/ml, spectinomycin 60 µg/ml, erythromycin  
372 1 µg/ml, lincomycin 10 µg/ml, kanamycin 5 µg/ml, xylose 0.08% and IPTG 20 µM. S750 media contains  
373 1 X S750 salts, 1 X Metal mix, 10 mM L-Glutamate (Sigma) and 1 % Carbon source (Glucose or Maltose  
374 (VWR)). Metal mix was prepared as a 100 X stock comprising of 2 mM Hydrochloric Acid (HCl)  
375 (Honeywell), 190 mM Magnesium Chloride Hexahydrate (Sigma), 65.9 mM Calcium Chloride Dihydrate  
376 (Sigma), 4.84 mM Manganese Chloride Tetrahydrate (Fisher), 0.106 mM Zinc Chloride (Sigma), 0.196  
377 mM Thiamine Chloride (Sigma) and 0.470 mM Iron (III) Chloride Hexahydrate (VWR). S750 salts were  
378 prepared as a 10 X stock containing 500 mM MOPS (Sigma), 100 mM Ammonium Sulphate (Sigma),  
379 Potassium Phosphate Monobasic (VWR) with pH adjusted to 7.0 with Potassium Hydroxide (VWR).

380 We found that the following considerations were important for reproducible results: (1) S750 must be  
381 made up fresh from the relevant stock solutions no more than 1-2 days before the experiments (see  
382 S750 preparation protocol in Supplementary Note 2). (2) cells must be cultured in highly aerobic  
383 conditions, here in 2-5 ml volumes in 125 ml conical flasks – notable *not* in 16 ml volume test tubes,  
384 (3) cells should be given 10 minutes to recover after being immobilized on the agarose pad before  
385 acquiring microscopy data. Deviations from these requirements led to decreased elongasome speed  
386 or reduced ratio of motile: immobile elongasomes.

### 387 Strain construction

388 All strains are derived from the PY79 strain [20]. All experimental strains were constructed with the  
389 *Δhag* mutant to disable flagellar motility and reduce cell chaining for VerCINI experiments [11].  
390 *B. subtilis* was transformed in accordance with standard protocols[21]. Oligonucleotides and strains  
391 used in this study are detailed in Supplementary Table 2.

392 SM01 (*mreB::mreB-HaloTag, Δhag*) was constructed by transforming bYS40 (Hussain et al. 2018) with  
393 gDNA containing *hag::erm* from the *Bacillus* knockout erythromycin (BKE) library (Koo et al. 2017),  
394 selecting for transformants on erythromycin and lincomycin. The strain was confirmed by PCR  
395 amplification of the *hag* region using oSM01 and oSM02.

396 SM28 (*mreB::mreB-HaloTag, rodA::Pspac-rodA, Δhag*) was produced by transforming SM01 with  
397 gDNA from YK2245 (Emami et al. 2017). Transformants were selected on 100 µM IPTG and kanamycin.  
398 The strain was confirmed by simplification of the *rodA* region using oSM15 and oSM43. In addition,  
399 the strain was streaked on NA plates in the presence and absence of 100 µM IPTG and was found to  
400 be IPTG dependent.

401 SM22 (*mreB::mreB-HaloTag, Δhag, ΔpbpA*) was constructed by transforming SM01 with gDNA  
402 containing *pbpA::kan* from the *Bacillus* knockout kanamycin (BKK) library (Koo et al. 2017), selecting

403 for transformants on kanamycin. The strain was confirmed by PCR amplification of the *pbpA* region  
404 using oSM19 and oSM20.

405 SM23 (*mreB::mreB-HaloTag, Δhag, ΔpbpH*) was constructed by transforming SM01 with gDNA  
406 containing *pbpH::kan* from the *Bacillus* knockout kanamycin (BKK) library (Koo et al. 2017), selecting  
407 for transformants on kanamycin. The strain was confirmed by PCR amplification of the *pbpH* region  
408 using oSM27 and oSM28.

409 SM41 (*mreB::mreB-HaloTag, Δhag, ΔmltG*) was constructed by transforming SM01 with gDNA  
410 containing *mltG::kan* from the *Bacillus* knockout kanamycin (BKK) library (Koo et al. 2017), selecting  
411 for transformants on kanamycin. The strain was confirmed by PCR amplification of the *mltG* region  
412 using oSM78 and oSM79.

413 All used strains are available on request to the authors.

#### 414 **Growth curves**

415 *B. subtilis* PY79 and derivative strains were grown overnight at 37°C in S750<sup>glucose</sup> containing relevant  
416 inducers. Overnight cells were diluted to an OD<sub>600</sub> of 0.05 in S750<sup>glucose</sup>, in a 96-well microtiter plate to  
417 a final volume of 200 μl. Growth was monitored for 12 hours using a SPECTROstar Nano plate reader  
418 (BMG Labtech) at 30°C.

#### 419 **Cell morphology analysis**

420 Cells were prepared for imaging in S750<sup>glucose</sup> at 30°C. Once the cultures had reached OD<sub>600</sub> 0.6 ± 0.1,  
421 Nile Red was added to 200 μl of cells to a working concentration of 1 μg/ml, and incubated at growth  
422 temperatures for 10 mins, prepared on agarose microscope slides as described below and cell  
423 morphology images recorded using the microscope described below. To measure cell width, a straight-  
424 line ROI was drawn over the short axis of the cell in FIJI and an intensity profile plotted. The intensity  
425 plots were exported to MATLAB where the centre of each peak and the distance between them were  
426 determined by fitting to a tilted circle model [11]. To measure cell length, a straight-line ROI was drawn  
427 from the pole to pole, or pole to septum and the length measured in FIJI.

#### 428 **Microscopy**

429 *VerCINI on custom single molecule microscopes.* Two very similar custom single molecule microscopes  
430 were used for experiments. Cells were illuminated with a 561 nm laser (Obis). A 100x TIRF objective  
431 (Nikon CFI Apochromat TIRF 100XC Oil) was used. A 200 mm tube lens (Thorlabs TTL200) and Prime  
432 BSI sCMOS camera (Teledyne Photometrics) were used for imaging, giving effective image pixel size  
433 of 65 nm/pixel. Imaging was done with a custom-built ring-TIRF module operated in ring-HiLO[22]  
434 using a pair of galvanometer mirrors (Thorlabs) spinning at 200 Hz. 8 minute time lapses were  
435 obtained with 500ms exposure at a power density of 16.9 W/cm<sup>2</sup> at a strobe interval of 6s unless  
436 otherwise stated. Power density was calculated based on 2.5 mW illumination power measured at the  
437 sample, over an illumination area of approximately 14,800 μm<sup>2</sup>.

438 *Structured Illumination Microscopy on a Nikon N-SIM.* Cells were illuminated a 561 nm laser (CVI  
439 Melles-Griot). A 100x TIRF objective (Nikon CFI Apochromat TIRF 100XC Oil) was used for imaging and  
440 an Andor iXon DU897 EMCCD camera was used, with a 2.5x magnifier (Nikon) and standard Nikon  
441 tube lens, giving an effective image pixel size of 64 nm/pixel. Cells were illuminated in TIRF-SIM mode,  
442 using a 2D-striped pattern. Each SIM image was formed from 9 raw images corresponds to 3 stripe  
443 angles and 3 stripe phases. SIM reconstruction was performed using proprietary Nikon software which  
444 implements the Gustaffson SIM reconstruction algorithm [23]. Reconstruction was carried out in NIS



445 elements using default settings; Illumination modulation contrast was set to 1.00, high resolution  
446 noise suppression was set to 1.00 and out of focus blur suppression was set to 0.05.

447 All microscopy was performed on microscopes equipped with incubators to maintain sample and  
448 microscope temperature at 30°C.

#### 449 **Single Molecule HaloTag labelling with JF-549**

450 At OD<sub>600</sub> of 0.6 ± 0.1, 500 µl cells were incubated for 15 minutes with JF-549 [12] dissolved in dimethyl  
451 sulfoxide (DMSO) to a final concentration of 25 pM at 30°C with shaking at 175 rpm. Stocks were  
452 prepared at concentrations to ensure a working DMSO concentration of <1%. Cells were then washed  
453 twice in 500 µl pre-warmed media.

#### 454 **Sample preparation for VerCINI microscopy**

455 Agarose microholes were formed by pouring molten 6% agarose dissolved in media (typically  
456 S750<sup>glucose</sup> unless otherwise stated) onto a silicon micropillar array as described previously [11].  
457 Patterned agarose was transferred into a Geneframe (Thermo Scientific) mounted on a glass slide, and  
458 excess agarose was cut away to ensure sufficient oxygen.

459 Cultures were concentrated 50-fold and 10 µl was applied to the pad, before centrifugation at 3,220  
460 RCF for 4 minutes (Eppendorf 5810 centrifuge with MTP/Flex buckets). Pads were then washed with  
461 pre warmed media before application of the cover slip (VWR 22 × 22 mm<sup>2</sup> Thickness no. 1.5).

#### 462 **VerCINI data analysis**

##### 463 *Pre-processing*

464 Videos were denoised using the ImageJ plugin PureDenoise [24], which is based on wavelet  
465 decomposition. For the largest image dataset- 0.5 s frame interval measurements in Figure 1e – a  
466 GPU-accelerated version of PureDenoise was developed and used  
467 (<http://www.GitHub.com/ZikaiSun/PureGpu>). This version also corrects a memory leak bug for large  
468 images in the original PureDenoise ImageJ plugin. Performance characterization of PureDenoiseGPU  
469 is shown in Supplementary Tables 5-6.

470 Denoised videos were registered using the ImageJ plugin StackReg [25]. Cropped region of interest  
471 (ROI) movies containing single in-focus cells were manually selected and exported for analysis using  
472 the publically available scripts ([https://github.com/HoldenLab/Ring\\_Analysis\\_IJ](https://github.com/HoldenLab/Ring_Analysis_IJ))

473 Images were background subtracted and kymographs extracted using a custom fitting model of diffuse  
474 out-of-focus cytoplasmic background plus localized protein signal as previously described [11].

##### 475 *Kymograph analysis of MreB single molecule dynamics.*

476 In ImageJ, a segmented line ROI was manually traced over each track, with segments indicating  
477 manually identified processive or paused subtracks. For each kymograph, an ROI set was saved. Using  
478 a custom FIJI plugin, 'Export\_XY\_Coords.ijm', the coordinates of each point in each track were  
479 exported to a '.csv' file. The coordinates of each track were analysed using custom python script 'Track  
480 data analysis-Full\_.ipynb', to determine MreB filament binding dynamics including bound lifetime,  
481 processivity. The required Analysis code is available: [https://github.com/HoldenLab/Kymograph-spt-  
482 analysis](https://github.com/HoldenLab/Kymograph-spt-analysis)

#### 483 **Stroboscopic analysis of photobleaching and MreB binding lifetime.**

484 We analysed MreB subunit unbinding lifetime and JF549 photobleaching lifetime using the  
485 stroboscopic illumination method of Gebhardt and coworkers [14]. Using a fixed illumination and

486 exposure time of 500 ms, we systematically increased the total time interval between frames, the  
487 strobe interval, and measured the apparent lifetime of labelled MreB molecules for each condition  
488 (Fig. 1d-e). We calculated the median lifetime of each dataset, with 95 % CIs calculated by  
489 bootstrapping. We then fit the median lifetime data to the equation,

$$490 \quad \tau_{obs} = \Delta t / \left( \frac{t_{exp}}{\tau_{bl}} + \frac{\Delta t}{\tau_{off}} \right),$$

491 where  $\Delta t$  is the strobe interval (the x-axis),  $\tau_{obs}$  is the apparent lifetime,  $t_{exp}$  is the fixed 500 ms  
492 exposure time,  $\tau_{bl}$  is the JF549 photobleaching lifetime and  $\tau_{off}$  is the MreB subunit unbinding  
493 lifetime. By fitting the data to the median apparent lifetimes, we obtained estimates of median  $\tau_{bl}$   
494 and  $\tau_{off}$ , rather than mean, consistent with the rest of the statistics in the manuscript. We obtained  
495 95 % CI estimates for  $\tau_{bl}$  and  $\tau_{off}$  by bootstrap resampling of the inputs into the stroboscopic fitting  
496 equation.

#### 497 **Switching rate analysis.**

498 We calculated single molecule switching rates (reversal, pausing, unbinding, initiation) by counting the  
499 number of each transition type from immobile or processive states, and dividing by the total duration  
500 of all immobile or processive states observed in the dataset [26]. 95 % confidence intervals on the  
501 switching rate were calculated by bootstrap sampling of individual tracks from the dataset.

#### 502 **Statistics**

503 Experiments were conducted in biological duplicate because variation between clonal bacterial  
504 samples was low, as estimated based on small range measured in replicate medians, unless otherwise  
505 indicated.

506 Averages reported were median values unless otherwise indicated. Medians of biological replicates  
507 are shown on figures as white-filled circles. 95% confidence interval of the median, or of the difference  
508 of medians, was estimated by bootstrapping. Interquartile range was indicated by IQR. Thick error bar  
509 lines in violin plots indicate interquartile range, thin lines indicate adjacent vales. Because variability  
510 between single molecules was far greater than the sample-to-sample variation, estimates of  
511 uncertainty (95% CIs, IQRs, etc.) were based on the single molecule datapoints. Sample size, indicating  
512 number of tracks/ track segments, technical and biological replicates, as appropriate, is presented for  
513 each dataset in Supplementary Table 1. Effect size estimates were calculated based on difference of  
514 medians, using either DABEST (Data Analysis with Bootstrap Coupled Estimation [27]) or custom  
515 bootstrapping scripts. All effect sizes are listed in Supplementary Table 7.

516 For estimates of the percentage of the population in a specific state (eg percentage of motile tracks),  
517 uncertainty is reported to the full data range (*Range*) of all biological replicates.

#### 518 **CODE AVAILABILITY**

519 Open source software for image analysis of VerCINI data was previously described and is available on  
520 the Holden Lab GitHub page: <https://github.com/HoldenLab/VerciniAnalysisJ>,  
521 <https://github.com/HoldenLab/ring-fitting2>,

522 Open source software for kymograph analysis available on the Holden Lab GitHub page:  
523 <https://github.com/HoldenLab/Kymograph-spt-analysis.git>

524 Open source PureDenoise-GPU denoising software is available on GitHub:  
525 <http://www.GitHub.com/ZikaiSun/PureGpu>.

526 Open source software for the tug-of-war simulations: <https://github.com/HoldenLab/lipowskiModel>

527 **REFERENCES**

- 528 [1] A. Vigouroux, B. Cordier, A. Aristov, L. Alvarez, G. Özbaykal, T. Chaze, E.R. Oldewurtel, M.  
529 Matondo, F. Cava, D. Bikard, S. van Teeffelen, Class-A penicillin binding proteins do not contribute  
530 to cell shape but repair cell-wall defects, *ELife*. 9 (2020) e51998.  
531 <https://doi.org/10.7554/eLife.51998>.
- 532 [2] M.F. Dion, M. Kapoor, Y. Sun, S. Wilson, J. Ryan, A. Vigouroux, S. van Teeffelen, R. Oldenbourg,  
533 E.C. Garner, *Bacillus subtilis* cell diameter is determined by the opposing actions of two distinct  
534 cell wall synthetic systems, *Nat. Microbiol.* 4 (2019) 1294–1305. <https://doi.org/10.1038/s41564-019-0439-0>.
- 536 [3] H. Cho, C.N. Wivagg, M. Kapoor, Z. Barry, P.D.A. Rohs, H. Suh, J.A. Marto, E.C. Garner, T.G.  
537 Bernhardt, Bacterial cell wall biogenesis is mediated by SEDS and PBP polymerase families  
538 functioning semi-autonomously, *Nat. Microbiol.* 1 (2016) 16172.  
539 <https://doi.org/10.1038/nmicrobiol.2016.172>.
- 540 [4] F. van den Ent, T. Izoré, T.A. Bharat, C.M. Johnson, J. Löwe, Bacterial actin MreB forms antiparallel  
541 double filaments, *ELife*. 3 (2014). <https://doi.org/10.7554/eLife.02634>.
- 542 [5] S. Hussain, C.N. Wivagg, P. Szwedziak, F. Wong, K. Schaefer, T. Izoré, L.D. Renner, M.J. Holmes, Y.  
543 Sun, A.W. Bisson-Filho, S. Walker, A. Amir, J. Löwe, E.C. Garner, MreB filaments align along  
544 greatest principal membrane curvature to orient cell wall synthesis, *ELife*. 7 (2018) e32471.  
545 <https://doi.org/10.7554/eLife.32471>.
- 546 [6] S. Dersch, C. Reimold, J. Stoll, H. Breddermann, T. Heimerl, H.J. Defeu Soufo, P.L. Graumann,  
547 Polymerization of *Bacillus subtilis* MreB on a lipid membrane reveals lateral co-polymerization of  
548 MreB paralogs and strong effects of cations on filament formation, *BMC Mol. Cell Biol.* 21 (2020)  
549 76. <https://doi.org/10.1186/s12860-020-00319-5>.
- 550 [7] J. Domínguez-Escobar, A. Chastanet, A.H. Crevenna, V. Fromion, R. Wedlich-Söldner, R. Carballido-  
551 López, Processive Movement of MreB-Associated Cell Wall Biosynthetic Complexes in Bacteria,  
552 *Science*. 333 (2011) 225–228. <https://doi.org/10.1126/science.1203466>.
- 553 [8] E.C. Garner, R. Bernard, W. Wang, X. Zhuang, D.Z. Rudner, T. Mitchison, Coupled, Circumferential  
554 Motions of the Cell Wall Synthesis Machinery and MreB Filaments in *B. subtilis*, *Science*. 333  
555 (2011) 222–225. <https://doi.org/10.1126/science.1203285>.
- 556 [9] S. van Teeffelen, S. Wang, L. Furchtgott, K.C. Huang, N.S. Wingreen, J.W. Shaevitz, Z. Gitai, The  
557 bacterial actin MreB rotates, and rotation depends on cell-wall assembly, *Proc. Natl. Acad. Sci.*  
558 108 (2011) 15822–15827. <https://doi.org/10.1073/pnas.1108999108>.
- 559 [10] S. Dersch, J. Mehl, L. Stuckenschneider, B. Mayer, J. Roth, A. Rohrbach, P.L. Graumann, Super-  
560 Resolution Microscopy and Single-Molecule Tracking Reveal Distinct Adaptive Dynamics of MreB  
561 and of Cell Wall-Synthesis Enzymes, *Front. Microbiol.* 11 (2020) 1946.  
562 <https://doi.org/10.3389/fmicb.2020.01946>.
- 563 [11] K.D. Whitley, S. Middlemiss, C. Jukes, C. Dekker, S. Holden, High-resolution imaging of bacterial  
564 spatial organization with vertical cell imaging by nanostructured immobilization (VerCINI), *Nat.*  
565 *Protoc.* 17 (2022) 847–869. <https://doi.org/10.1038/s41596-021-00668-1>.
- 566 [12] J.B. Grimm, B.P. English, J. Chen, J.P. Slaughter, Z. Zhang, A. Revyakin, R. Patel, J.J. Macklin, D.  
567 Normanno, R.H. Singer, T. Lionnet, L.D. Lavis, A general method to improve fluorophores for live-  
568 cell and single-molecule microscopy, *Nat. Methods*. 12 (2015) 244–250.  
569 <https://doi.org/10.1038/nmeth.3256>.
- 570 [13] C. Billaudeau, Z. Yao, C. Cornilleau, R. Carballido-López, A. Chastanet, MreB Forms Subdiffraction  
571 Nanofilaments during Active Growth in *Bacillus subtilis*, *MBio*. 10 (2019).  
572 <https://doi.org/10.1128/mBio.01879-18>.
- 573 [14] J.C.M. Gebhardt, D.M. Suter, R. Roy, Z.W. Zhao, A.R. Chapman, S. Basu, T. Maniatis, X.S. Xie, Single-  
574 molecule imaging of transcription factor binding to DNA in live mammalian cells, *Nat. Methods*.  
575 10 (2013) 421–426. <https://doi.org/10.1038/nmeth.2411>.

- 576 [15] C. Billaudeau, A. Chastanet, Z. Yao, C. Cornilleau, N. Mirouze, V. Fromion, R. Carballido-López,  
577 Contrasting mechanisms of growth in two model rod-shaped bacteria, *Nat. Commun.* 8 (2017)  
578 15370. <https://doi.org/10.1038/ncomms15370>.
- 579 [16] R. Yunck, H. Cho, T.G. Bernhardt, Identification of MltG as a potential terminase for peptidoglycan  
580 polymerization in bacteria, *Mol. Microbiol.* 99 (2016) 700–718.  
581 <https://doi.org/10.1111/mmi.13258>.
- 582 [17] M.A. Welte, Bidirectional Transport along Microtubules, *Curr. Biol.* 14 (2004) R525–R537.  
583 <https://doi.org/10.1016/j.cub.2004.06.045>.
- 584 [18] P. v. Olshausen, H.J. Defeu Soufo, K. Wicker, R. Heintzmann, P.L. Graumann, A. Rohrbach,  
585 Superresolution Imaging of Dynamic MreB Filaments in *B. subtilis*—A Multiple-Motor-Driven  
586 Transport?, *Biophys. J.* 105 (2013) 1171–1181. <https://doi.org/10.1016/j.bpj.2013.07.038>.
- 587 [19] M.J.I. Müller, S. Klumpp, R. Lipowsky, Tug-of-war as a cooperative mechanism for bidirectional  
588 cargo transport by molecular motors, *Proc. Natl. Acad. Sci.* 105 (2008) 4609–4614.  
589 <https://doi.org/10.1073/pnas.0706825105>.
- 590 [20] P.J. Youngman, J.B. Perkins, R. Losick, Genetic transposition and insertional mutagenesis in  
591 *Bacillus subtilis* with *Streptococcus faecalis* transposon Tn917., *Proc. Natl. Acad. Sci. U. S. A.* 80  
592 (1983) 2305–2309.
- 593 [21] C.R. Harwood, S.M. Cutting, *Molecular biological methods for Bacillus*, Wiley, 1990.  
594 [https://scholar.google.com/scholar\\_lookup?title=Molecular+biological+methods+for+Bacillus&a](https://scholar.google.com/scholar_lookup?title=Molecular+biological+methods+for+Bacillus&author=Harwood%2C+Colin+R.&publication_year=1990)  
595 [uthor=Harwood%2C+Colin+R.&publication\\_year=1990](https://scholar.google.com/scholar_lookup?title=Molecular+biological+methods+for+Bacillus&author=Harwood%2C+Colin+R.&publication_year=1990) (accessed July 19, 2022).
- 596 [22] K.L. Ellefsen, J.L. Dynes, I. Parker, Spinning-Spot Shadowless TIRF Microscopy, *PLOS ONE.* 10 (2015)  
597 e0136055. <https://doi.org/10.1371/journal.pone.0136055>.
- 598 [23] M.G.L. Gustafsson, Surpassing the lateral resolution limit by a factor of two using structured  
599 illumination microscopy. SHORT COMMUNICATION, *J. Microsc.* 198 (2000) 82–87.  
600 <https://doi.org/10.1046/j.1365-2818.2000.00710.x>.
- 601 [24] F. Luisier, C. Vonesch, T. Blu, M. Unser, Fast interscale wavelet denoising of Poisson-corrupted  
602 images, *Signal Process.* 90 (2010) 415–427. <https://doi.org/10.1016/j.sigpro.2009.07.009>.
- 603 [25] P. Thevenaz, U.E. Ruttimann, M. Unser, A pyramid approach to subpixel registration based on  
604 intensity, *IEEE Trans. Image Process.* 7 (1998) 27–41. <https://doi.org/10.1109/83.650848>.
- 605 [26] G. Özbaykal, E. Wollrab, F. Simon, A. Vigouroux, B. Cordier, A. Aristov, T. Chaze, M. Matondo, S.  
606 van Teeffelen, The transpeptidase PBP2 governs initial localization and activity of the major cell-  
607 wall synthesis machinery in *E. coli*, *ELife.* 9 (2020) e50629. <https://doi.org/10.7554/eLife.50629>.
- 608 [27] J. Ho, T. Tumkaya, S. Aryal, H. Choi, A. Claridge-Chang, Moving beyond P values: data analysis with  
609 estimation graphics, *Nat. Methods.* 16 (2019) 565–566. [https://doi.org/10.1038/s41592-019-](https://doi.org/10.1038/s41592-019-0470-3)  
610 0470-3.

611
